# Supplementary material for: Hydrogels from TEMPO-Oxidized Nanofibrillated Cellulose Support In Vitro Cultivation of Encapsulated Human Mesenchymal Stem Cells
Source: PubMed Central journal article supplement (PMC9945099; doi:10.1021/acsabm.2c00854), 2023-02-06
Supplement: mt2c00854_si_001.pdf [file mt2c00854_si_001.pdf]

## Supporting Information

# **Hydrogels from TEMPO-oxidized nanofibrillated cellulose support *in vitro* cultivation of encapsulated human mesenchymal stem cells**

*Ilias Nikolits*<sup>1</sup>, *Sara Radwan*<sup>2</sup>, *Falk Liebner*<sup>3</sup>, *Wolf Dietrich*<sup>4</sup>, *Dominik Egger*<sup>1</sup>, *Farhad Chariyev-Prinz*<sup>1</sup> and *Cornelia Kasper*<sup>1, \*</sup>

<sup>1</sup> Institute of Cell and Tissue Culture Technologies, Department of Biotechnology, University of Natural Resources and Life Sciences BOKU Vienna, Muthgasse 18, 1190 Vienna, Austria

<sup>2</sup> Department of Life Science Engineering, University of Applied Sciences Technikum Vienna, Höchstädtplatz 6, 1200 Vienna, Austria

<sup>3</sup> Institute of Chemistry of Renewable Resources, Department of Chemistry, University of Natural Resources and Life Sciences BOKU Vienna, Konrad Lorenz Straße 24, 3430 Tulln, Austria

<sup>4</sup> Department of Gynecology and Obstetrics, Karl Landsteiner University of Health Sciences,

Alter Ziegelweg 10, 3430 Tulln, Austria

**Corresponding Author:** \*Cornelia Kasper. Email: cornelia.kasper@boku.ac.at

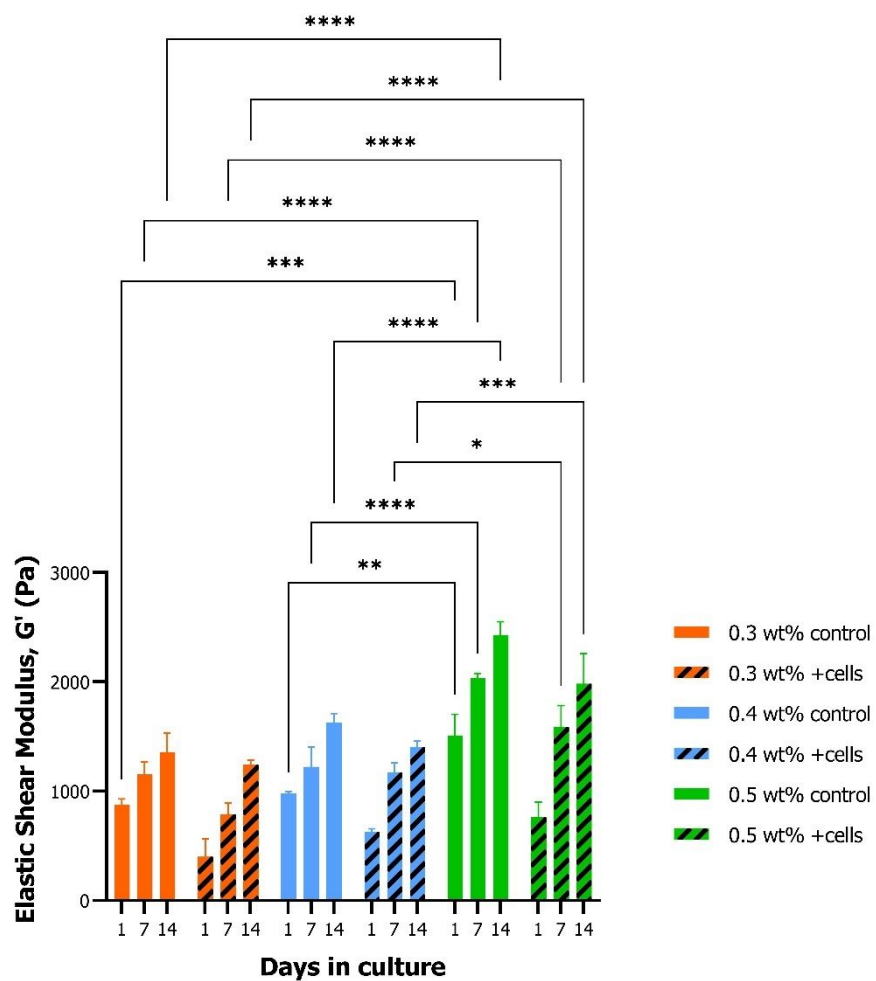

**Figure S1.** Mechanical characterization of CNF hydrogels. Elastic shear modulus measurements for different CNF concentration hydrogels with and without MSCs after 1, 7 and 14 days from cell

encapsulation. Significantly higher  $G'$  in relation to the CNF wt% concentration of the samples at different time points of culture ( $\alpha=0.05$ ).

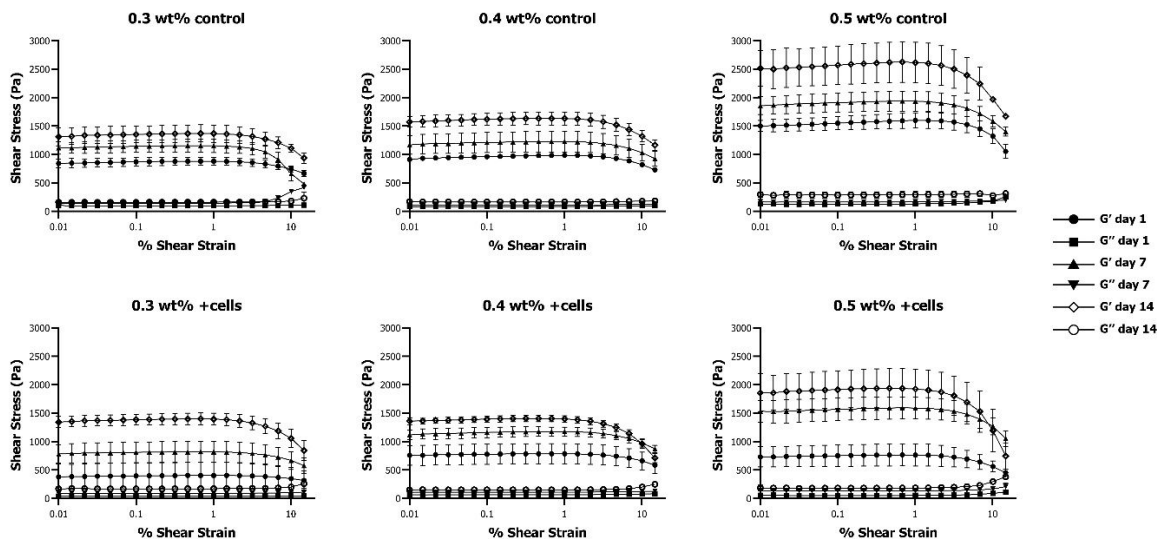

**Figure S2.** SAOS measurements performed to evaluate the viscoelastic properties of the different CNF concentration hydrogels with and without MSCs after 1, 7 and 14 days from cell encapsulation. The elastic shear modulus  $G'$  was determined at a strain of 0.5%, which was within the linear viscoelastic regime for all samples.
